# Supplementary material
Source: PubMed Central journal article supplement (PMC3852655)

## **Structure of the Isolated Pin1 WW Domain *via* Racemic Crystallization (Supplementary Material)**

David E. Mortenson, Dale F. Kreitler, Hyun Gi Yun, Samuel H. Gellman, and Katrina T. Forest

### **Materials**

Peptides were synthesized on solid-phase using N-terminal Fmoc protection. Amino acids were activated using 2-(6-chloro-1H-benzotriazole-1-yl)-1,1,3,3-tetramethyluronium hexafluorophosphate (HCTU) and 6-chloro-1-hydroxybenzotriazole (Cl-HOBt). Fmoc-protected amino acids with trifluoroacetic acid-labile side-chain protecting groups, HCTU, and Cl-HOBt were purchased from ChemImpex. N,N-dimethylformamide (DMF) and N,N-diisopropylethylamine (DIEA) were purchased from Sigma-Aldrich. NovaPEG Wang resin was purchased from Novabiochem and preloaded with Fmoc-Gly-OH by combining 5 equivalents of the protected amino acid with 1-(mesitylene-2-sulfonyl)-3-nitro-1H-1,2,4-triazole (MSNT; 5 equivalents) and N-methylimidazole (3.75 equivalents) in methylene chloride, and adding of this solution to the pre-swelled resin for at least 4 hours with agitation. The resin was drained, washed with dimethyl formamide and then methylene chloride, and subjected to the same reaction conditions again to ensure adequate loading of the resin.

### **HPLC Purification and Characterization of Pin1 WW Domain Peptides**

Peptides were purified on a Shimadzu SCL-10A liquid chromatograph fitted with a C<sub>18</sub>-functionalized reverse-phase column. The binary solvent system used in purifications used H<sub>2</sub>O:CF<sub>3</sub>CO<sub>2</sub>H (100:0.1 v/v) as A solvent and CH<sub>3</sub>CN:CF<sub>3</sub>CO<sub>2</sub>H (100:0.1 v/v) as B solvent. Following purification, fractions were pooled and lyophilized to dryness. Polypeptide identity was confirmed using matrix-assisted laser desorption ionization-time of flight (MALDI-TOF) mass spectrometry. Purity was determined by analytical HPLC.

L-Pin1 WW Domain

C<sub>18</sub> analytical column (250 X 4.6 mm, Supelco), flow rate 1 mL/min, gradient 10-60% B solvent (CH<sub>3</sub>CN:CF<sub>3</sub>CO<sub>2</sub>H, 100:0.1 v/v) in A (H<sub>2</sub>O:CF<sub>3</sub>CO<sub>2</sub>H, 100:0.1 v/v) over 50 minutes, retention time of 22.5 minutes. MALDI-TOF [M+H]<sup>+</sup> calculated 4167.6, observed 4169.3.

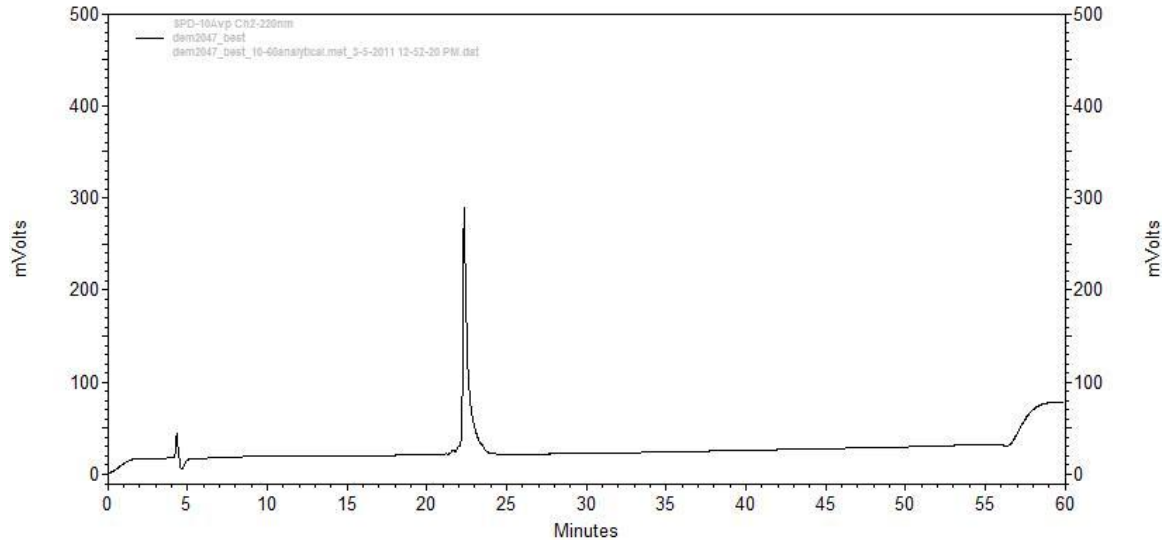D-Pin1 WW domain

C<sub>18</sub> analytical column (250 X 4.6 mm, Supelco), flow rate 1 mL/min, gradient 10-60% B solvent (CH<sub>3</sub>CN:CF<sub>3</sub>CO<sub>2</sub>H, 100:0.1 v/v) in A (H<sub>2</sub>O:CF<sub>3</sub>CO<sub>2</sub>H, 100:0.1 v/v) over 50 minutes, retention time of 22.5 minutes. MALDI-TOF [M+H]<sup>+</sup> calculated 4167.6, observed 4169.3.

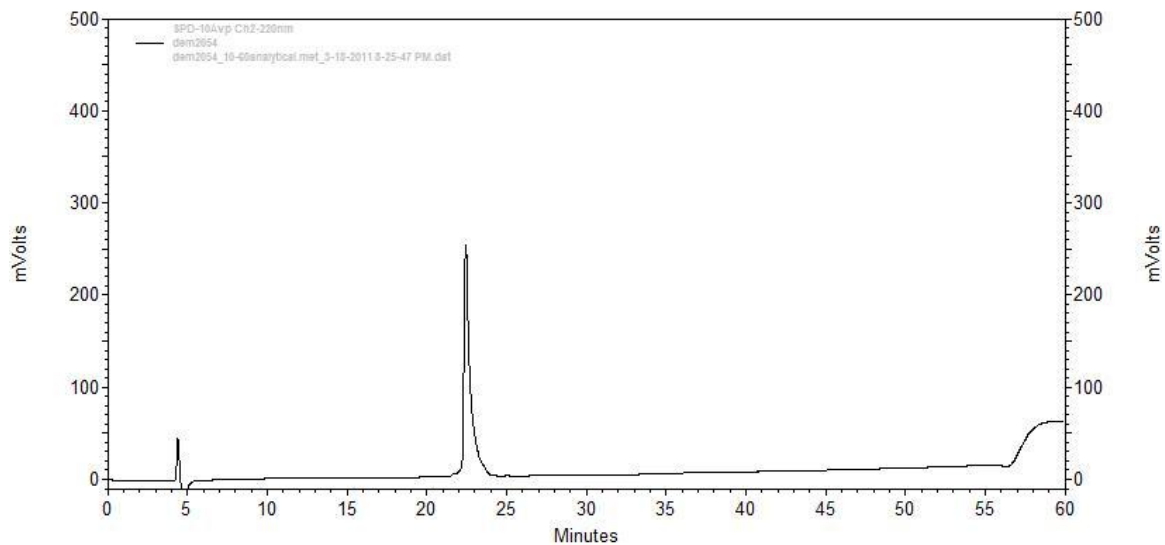

Supplement: d-69-02506-sup1.pdf [file d-69-02506-sup1.pdf]
